# Supplementary material
Source: publisher site journal article supplement (http://www.spandidos-publications.com/3947/downloadSupplementary)

Figure S1. Anatomy and hematoxylin and eosin staining of *Microtus fortis* (A) *M. fortis* with and without ascites. (B) Anatomy of *M. fortis* with ascites, the red boxes indicate diseased tissue. (C) Anatomy of a healthy *M. fortis*, the blue boxes healthy tissue. (D) Ovarian tissue of an ascitic *M. fortis* (diameters of tissue ~1 cm). Papillary cancer cell structure of (E) right and (F) left ovarian tissue was determined using H&E staining.

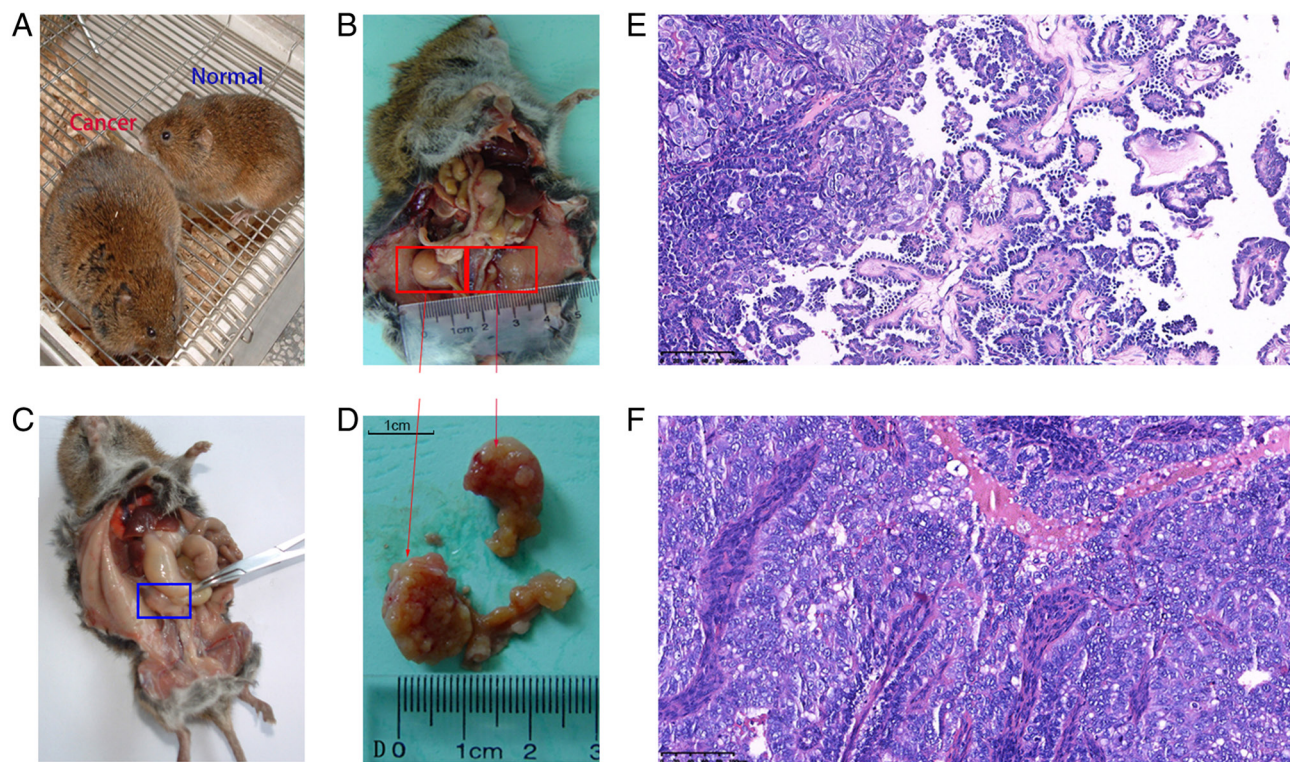

Supplement: Supplementary file 1 [file downloadSupplementary]
